# Supplementary material
Source: PubMed Central journal article supplement (PMC2962493)
Supplement: supp_M110.150151_ZPang_Suppl_material.pdf [file supp_M110.150151_ZPang_Suppl_material.pdf]

## SUPPLEMENTARY MATERIALS

for

### “Calmodulin suppresses synaptotagmin-2 transcription in cortical neurons” by

Zhiping P. Pang<sup>1,3\*</sup>, Wei Xu<sup>1,2\*</sup>, Peng Cao<sup>2</sup>, and Thomas C. Südhof<sup>1,2,3</sup>

#### Supplementary Figure 1

*Activity blockade and activation of CaM Kinase II $\alpha$  do not increase the expression of Syt2.*

**A.** Activity blockade does not activate Syt2 expression in cultured cortical neurons from wild-type mice. Neurons were treated at DIV12 with TTX (1  $\mu$ M, to block action potentials), DL-APV (50  $\mu$ M, to block NMDA receptors) or nifedipine (20  $\mu$ M, to block L-type Ca<sup>2+</sup>-channels), and harvested after 48, 72, or 96 hrs. To ensure the continued activity of different blockers, the same amounts of blockers were added again at 48 hrs for the 72 and 96 hrs treatments. Samples were analyzed by immunoblotting for the indicated proteins (abbreviations same as above).

**B.** CaMKII $\alpha$  does not mediate the CaM-dependent suppression of Syt2 expression. Cultured cortical neurons from newborn wild-type mice were infected at DIV5 with control lentivirus or with CaM KD lentivirus expressing CaM shRNAs without a rescue construct, or with wild-type CaMKII $\alpha$  or constitutively active mutant CamKII $\alpha$ <sup>T286D</sup> as rescue constructs. Neurons were analyzed by immunoblotting for Syt2 and syntaxin-1 (Synt.) at DIV 14.

#### Supplemental Table 1

##### List of genes whose expression levels are affected by CaM-RNAi

| Accession No.                               | Gene Symbol | Description                                                 | Relative mRNA Level |        |         |        |
|---------------------------------------------|-------------|-------------------------------------------------------------|---------------------|--------|---------|--------|
|                                             |             |                                                             | CaM KD1             |        | CaM KD2 |        |
|                                             |             |                                                             | -                   | + Res. | -       | + Res. |
| <b>Category 1: Transcription Regulation</b> |             |                                                             |                     |        |         |        |
| NM_001081338                                | L3mbtl      | l(3)mbt-like (Drosophila)                                   | 1.59                | 0.71   | 1.77    | 1.12   |
| NM_130893                                   | Scrt1       | scratch homolog 1, zinc finger protein (Drosophila)         | 1.51                | 0.93   | 1.42    | 0.97   |
| NM_008671                                   | Nap1l2      | nucleosome assembly protein 1-like 2                        | 1.49                | 1.06   | 1.46    | 0.97   |
| NM_009035                                   | Rbpj        | recombination signal binding protein for immunoglobulin kap | 1.48                | 1.20   | 1.79    | 1.11   |
| NM_001077398                                | Ldb2        | LIM domain binding 2                                        | 0.71                | 0.87   | 0.66    | 1.31   |
| NM_019743                                   | Rybp        | RING1 and YY1 binding protein                               | 0.69                | 1.05   | 0.49    | 1.03   |
| NM_173780                                   | Klf8        | Kruppel-like factor 8                                       | 0.69                | 1.08   | 0.60    | 1.06   |
| NM_053123                                   | Smarca1     | SWI                                                         | 0.67                | 1.03   | 0.50    | 0.93   |
| NM_025282                                   | Mef2c       | myocyte enhancer factor 2C                                  | 0.65                | 0.89   | 0.54    | 1.23   |
| NM_009769                                   | Klf5        | Kruppel-like factor 5                                       | 0.65                | 1.03   | 0.66    | 0.99   |
| NM_008719                                   | Npas2       | neuronal PAS domain protein 2                               | 0.65                | 1.20   | 0.64    | 1.07   |
| NM_009234                                   | Sox11       | SRY-box containing gene 11                                  | 0.62                | 1.00   | 0.61    | 1.06   |
| NM_175045                                   | Bcor        | Bcl6 interacting corepressor                                | 0.60                | 1.10   | 0.67    | 1.34   |
| NM_024124                                   | Hdac9       | histone deacetylase 9                                       | 0.58                | 1.07   | 0.65    | 1.20   |

| Accession No.                            | Gene Symbol | Description                                                    | Relative mRNA Level |        |         |        |
|------------------------------------------|-------------|----------------------------------------------------------------|---------------------|--------|---------|--------|
|                                          |             |                                                                | CaM KD1             |        | CaM KD2 |        |
|                                          |             |                                                                | -                   | + Res. | -       | + Res. |
| NM_009717                                | Neurod6     | neurogenic differentiation 6                                   | 0.57                | 1.87   | 0.18    | 0.88   |
| NM_001081557                             | Camta1      | calmodulin binding transcription activator 1                   | 0.53                | 0.90   | 0.63    | 1.19   |
| NM_018781                                | Egr3        | early growth response 3                                        | 0.30                | 1.18   | 0.59    | 1.53   |
| <b>Category 2: Membrane Receptors</b>    |             |                                                                |                     |        |         |        |
| NM_172659                                | Slc2a6      | solute carrier family 2 (facilitated glucose transporter)      | 2.12                | 0.88   | 2.09    | 0.99   |
| NM_054055                                | Slc13a3     | solute carrier family 13 (sodium-dependent dicarboxylate       | 1.69                | 0.82   | 1.65    | 0.77   |
| NM_153145                                | Abca8a      | ATP-binding cassette, sub-family A (ABC1), member 8a           | 1.67                | 0.68   | 1.40    | 0.87   |
| NM_178405                                | Atp1a2      | ATPase, Na+                                                    | 1.43                | 1.00   | 1.41    | 0.91   |
| NM_030682                                | Tlr1        | toll-like receptor 1                                           | 1.42                | 0.96   | 1.50    | 1.21   |
| NM_009199                                | Slc1a1      | solute carrier family 1 (neuronal)                             | 0.70                | 1.11   | 0.63    | 1.01   |
| NM_011216                                | Ptpro       | protein tyrosine phosphatase, receptor type, O                 | 0.70                | 1.01   | 0.57    | 1.15   |
| NM_008983                                | Ptprk       | protein tyrosine phosphatase, receptor type, K                 | 0.69                | 0.88   | 0.45    | 1.46   |
| NM_011391                                | Slc16a7     | solute carrier family 16 (monocarboxylic acid transporter      | 0.69                | 0.96   | 0.70    | 1.28   |
| NM_177328                                | Grm7        | glutamate receptor, metabotropic 7                             | 0.67                | 1.20   | 0.50    | 1.25   |
| NM_001004761                             | Gpr158      | G protein-coupled receptor 158                                 | 0.67                | 1.06   | 0.60    | 1.36   |
| NM_008746                                | Ntrk3       | neurotrophic tyrosine kinase, receptor, type 3                 | 0.65                | 1.17   | 0.55    | 1.11   |
| NM_010077                                | Drd2        | dopamine receptor 2                                            | 0.64                | 0.87   | 0.62    | 1.10   |
| NM_148946                                | Slc8a2      | solute carrier family 8                                        | 0.63                | 1.01   | 0.54    | 1.67   |
| NM_145066                                | Gpr85       | G protein-coupled receptor 85                                  | 0.61                | 0.91   | 0.46    | 1.11   |
| NM_199058                                | Gpr6        | G protein-coupled receptor 6                                   | 0.61                | 0.87   | 0.64    | 1.80   |
| NM_173410                                | Gpr26       | G protein-coupled receptor 26                                  | 0.36                | 1.17   | 0.46    | 1.31   |
| <b>Category 3: Membrane Ion Channels</b> |             |                                                                |                     |        |         |        |
| NM_001013390                             | Scn4b       | sodium channel, type IV, beta                                  | 2.31                | 1.09   | 6.81    | 1.06   |
| NM_009783                                | Cacna1g     | calcium channel, voltage-dependent, T type, alpha 1G           | 1.59                | 0.70   | 1.57    | 1.18   |
| NM_011322                                | Scn1b       | sodium channel, voltage-gated, type I, beta                    | 1.47                | 1.00   | 1.69    | 0.88   |
| NM_133207                                | Kcnh7       | potassium voltage-gated channel, subfamily H (eag-related)     | 0.71                | 1.14   | 0.54    | 1.36   |
| NM_001099298                             | Scn2a1      | sodium channel, voltage-gated, type II, alpha 1                | 0.71                | 1.03   | 0.60    | 1.30   |
| NM_009782                                | Cacna1e     | calcium channel, voltage-dependent, R type, alpha 1E sub       | 0.68                | 0.93   | 0.61    | 1.25   |
| NM_019697                                | Kcnd2       | potassium voltage-gated channel, Shal-related family, member 2 | 0.66                | 0.94   | 0.54    | 0.95   |
| NM_008170                                | Grin2a      | glutamate receptor, ionotropic, NMDA2A (epsilon 1)             | 0.65                | 1.01   | 0.45    | 1.00   |
| NM_001034013                             | Accn1       | amiloride-sensitive cation channel 1, neuronal                 | 0.65                | 0.84   | 0.65    | 1.13   |
| NM_153512                                | Kcng3       | potassium voltage-gated channel, subfamily G, member 3         | 0.65                | 1.07   | 0.45    | 1.22   |
| NM_007583                                | Cacng2      | calcium channel, voltage-dependent, gamma subunit 2            | 0.61                | 0.95   | 0.69    | 0.98   |
| NM_023872                                | Kcnq5       | potassium voltage-gated channel, subfamily Q, member 5         | 0.60                | 1.02   | 0.42    | 0.99   |

| Accession No.                                                | Gene Symbol | Description                                                 | Relative mRNA Level |        |         |        |
|--------------------------------------------------------------|-------------|-------------------------------------------------------------|---------------------|--------|---------|--------|
|                                                              |             |                                                             | CaM KD1             |        | CaM KD2 |        |
|                                                              |             |                                                             | -                   | + Res. | -       | + Res. |
| NM_010601                                                    | Kcnh3       | potassium voltage-gated channel, subfamily H (eag-related)  | 0.58                | 1.10   | 0.50    | 1.52   |
| NM_001044308                                                 | Cacna1i     | calcium channel, voltage-dependent, alpha 1I subunit        | 0.46                | 0.99   | 0.47    | 1.04   |
| NM_019430                                                    | Cacng3      | calcium channel, voltage-dependent, gamma subunit 3         | 0.44                | 1.28   | 0.64    | 1.74   |
| NM_026200                                                    | Kcnv1       | potassium channel, subfamily V, member 1                    | 0.37                | 1.19   | 0.47    | 2.27   |
| <b>Category 4: Cytoskeleton</b>                              |             |                                                             |                     |        |         |        |
| NM_139128                                                    | Coro6       | coronin, actin binding protein 6                            | 3.46                | 0.99   | 4.45    | 1.11   |
| NM_010904                                                    | Nefh        | neurofilament, heavy polypeptide                            | 2.78                | 0.74   | 2.73    | 0.62   |
| NM_032393                                                    | Mtap1a      | microtubule-associated protein 1 A                          | 2.42                | 0.92   | 2.40    | 0.87   |
| NM_001039546                                                 | Myo6        | myosin VI                                                   | 1.43                | 0.96   | 1.43    | 1.05   |
| NM_026369                                                    | Arpc5       | actin related protein 2                                     | 0.71                | 1.07   | 0.55    | 0.96   |
| NM_001081230                                                 | Mtap9       | microtubule-associated protein 9                            | 0.71                | 0.92   | 0.63    | 1.00   |
| NM_016747                                                    | Dlg3        | discs, large homolog 3 (Drosophila)                         | 0.68                | 1.00   | 0.60    | 0.90   |
| NM_011983                                                    | Homer2      | homer homolog 2 (Drosophila)                                | 0.67                | 1.00   | 0.52    | 1.14   |
| NM_019824                                                    | Arpc3       | actin related protein 2                                     | 0.67                | 1.11   | 0.61    | 0.93   |
| NM_198618                                                    | Dlgap3      | discs, large (Drosophila) homolog-associated protein 3      | 0.67                | 1.20   | 0.69    | 1.17   |
| NM_172910                                                    | Dlgap2      | discs, large (Drosophila) homolog-associated protein 2      | 0.66                | 0.92   | 0.58    | 0.93   |
| NM_007864                                                    | Dlg4        | PSD-95                                                      | 0.62                | 0.94   | 0.69    | 1.11   |
| NM_021883                                                    | Tmod1       | tropomodulin 1                                              | 0.60                | 1.21   | 0.70    | 1.57   |
| NM_016695                                                    | Mpp2        | membrane protein, palmitoylated 2 (MAGUK p55 subfamily memb | 0.58                | 0.91   | 0.54    | 1.10   |
| NM_021287                                                    | Spnb3       | spectrin beta 3                                             | 0.52                | 0.90   | 0.58    | 1.23   |
| NM_147176                                                    | Homer1      | homer homolog 1 (Drosophila)                                | 0.45                | 1.24   | 0.48    | 1.20   |
| NM_019518                                                    | Grasp       | GRP1 (general receptor for phosphoinositides 1)-associated  | 0.36                | 1.34   | 0.69    | 1.49   |
| NM_018790                                                    | Arc         | activity regulated cytoskeletal-associated protein          | 0.35                | 1.99   | 0.71    | 1.90   |
| <b>Category 5: Calcium signaling (Channels not included)</b> |             |                                                             |                     |        |         |        |
| NM_011242                                                    | Rasgrp2     | RAS, guanyl releasing protein 2                             | 2.87                | 1.17   | 2.03    | 1.03   |
| NM_011311                                                    | S100a4      | S100 calcium binding protein A4                             | 1.54                | 1.09   | 1.60    | 0.87   |
| NM_178617                                                    | Necab1      | N-terminal EF-hand calcium binding protein 1                | 0.71                | 1.06   | 0.51    | 1.58   |
| NM_134094                                                    | Ncald       | neurocalcin delta                                           | 0.69                | 0.89   | 0.63    | 1.02   |
| NM_007873                                                    | Doc2b       | double C2, beta                                             | 0.68                | 0.84   | 0.48    | 1.07   |
| NM_009790                                                    | Calm1       | calmodulin 1                                                | 0.60                | 0.35   | 0.38    | 0.26   |
| NM_153166                                                    | Cpne5       | copine V                                                    | 0.58                | 1.38   | 0.54    | 1.52   |
| NM_007589                                                    | Calm2       | calmodulin 2                                                | 0.47                | 0.53   | 0.34    | 0.39   |
| NM_010471                                                    | Hpca        | hippocalcin                                                 | 0.40                | 0.96   | 0.40    | 1.31   |
| NM_007590                                                    | Calm3       | calmodulin 3                                                | 0.40                | 0.19   | 0.19    | 0.09   |
| <b>Category 6: Intracellular signal transduction</b>         |             |                                                             |                     |        |         |        |

| Accession No.      | Gene Symbol | Description                                                 | Relative mRNA Level |        |         |        |
|--------------------|-------------|-------------------------------------------------------------|---------------------|--------|---------|--------|
|                    |             |                                                             | CaM KD1             |        | CaM KD2 |        |
|                    |             |                                                             | -                   | + Res. | -       | + Res. |
| NM_010229          | Flt3        | FMS-like tyrosine kinase 3                                  | 2.32                | 1.00   | 2.80    | 1.06   |
| NM_175178          | Aifm3       | apoptosis-inducing factor, mitochondrion-associated 3       | 1.72                | 0.72   | 2.51    | 0.96   |
| NM_010404          | Hap1        | huntingtin-associated protein 1                             | 1.69                | 0.79   | 1.55    | 0.53   |
| NM_011756          | Zfp36       | zinc finger protein 36                                      | 1.65                | 1.10   | 1.61    | 0.98   |
| NM_008832          | Phka1       | phosphorylase kinase alpha 1                                | 1.58                | 0.97   | 1.54    | 1.11   |
| NM_008817          | Peg3        | paternally expressed 3                                      | 1.57                | 0.73   | 2.15    | 1.10   |
| NM_013834          | Sfrp1       | secreted frizzled-related protein 1                         | 1.56                | 0.96   | 1.83    | 1.09   |
| NM_010717          | Limk1       | LIM-domain containing, protein kinase                       | 1.54                | 0.90   | 1.57    | 0.67   |
| ENSMUST00000055576 | Pcsk6       | proprotein convertase subtilisin                            | 1.49                | 0.86   | 1.53    | 0.82   |
| NM_172778          | Maob        | monoamine oxidase B                                         | 1.48                | 0.93   | 1.76    | 1.02   |
| NM_009035          | Rbpj        | recombination signal binding protein for immunoglobulin kap | 1.48                | 1.20   | 1.79    | 1.11   |
| NM_029094          | Pik3cb      | phosphatidylinositol 3-kinase, catalytic, beta polypeptid   | 1.46                | 0.72   | 2.07    | 1.04   |
| NM_172263          | Pde8b       | phosphodiesterase 8B                                        | 1.46                | 0.95   | 1.44    | 1.17   |
| NM_007928          | Mark2       | MAP                                                         | 0.71                | 1.01   | 0.71    | 0.97   |
| ENSMUST00000076810 | Kalrn       | kalirin, RhoGEF kinase                                      | 0.71                | 0.95   | 0.59    | 1.28   |
| NM_029933          | Bcl9        | B-cell CLL                                                  | 0.71                | 0.85   | 0.62    | 0.88   |
| NM_033264          | Arpp21      | cyclic AMP-regulated phosphoprotein, 21                     | 0.71                | 0.95   | 0.62    | 1.48   |
| NM_207223          | Centb5      | centaurin, beta 5                                           | 0.71                | 0.98   | 0.67    | 0.93   |
| NM_178681          | Dgkb        | diacylglycerol kinase, beta                                 | 0.69                | 1.16   | 0.70    | 1.12   |
| NM_153171          | Rgs13       | regulator of G-protein signaling 13                         | 0.69                | 1.62   | 0.67    | 1.72   |
| NM_011104          | Prkce       | protein kinase C, epsilon                                   | 0.69                | 0.86   | 0.64    | 1.16   |
| NM_008083          | Gap43       | growth associated protein 43                                | 0.69                | 1.25   | 0.69    | 0.98   |
| NM_139147          | Rab40b      | Rab40b, member RAS oncogene family                          | 0.67                | 1.05   | 0.57    | 1.01   |
| NM_177751          | Cnksr2      | connector enhancer of kinase suppressor of Ras 2            | 0.66                | 0.99   | 0.48    | 1.24   |
| NM_183315          | Ctxn1       | cortexin 1                                                  | 0.65                | 0.96   | 0.55    | 1.01   |
| NM_007634          | Ccnf        | cyclin F                                                    | 0.65                | 1.21   | 0.61    | 0.86   |
| NM_172858          | Pak7        | p21 (CDKN1A)-activated kinase 7                             | 0.65                | 0.90   | 0.51    | 1.07   |
| BC024265           | Mast3       | microtubule associated serine                               | 0.65                | 1.03   | 0.68    | 1.08   |
| NM_021389          | Sh3kbp1     | SH3-domain kinase binding protein 1                         | 0.64                | 1.24   | 0.62    | 0.94   |
| NM_198114          | Dagla       | diacylglycerol lipase, alpha                                | 0.64                | 0.93   | 0.61    | 1.04   |
| NM_080428          | Fbxw7       | F-box and WD-40 domain protein 7, archipelago homolog (Dro  | 0.64                | 0.98   | 0.59    | 1.01   |
| NM_029761          | Dok5        | docking protein 5                                           | 0.63                | 1.24   | 0.67    | 1.25   |
| NM_011201          | Ptpn1       | protein tyrosine phosphatase, non-receptor type 1           | 0.63                | 0.92   | 0.65    | 1.27   |
| NM_001122998       | Tiam2       | T-cell lymphoma invasion and metastasis 2                   | 0.63                | 1.02   | 0.61    | 1.18   |
| NM_026878          | Ras11b      | RAS-like, family 11, member B                               | 0.62                | 1.11   | 0.70    | 0.87   |

| Accession No.                              | Gene Symbol | Description                                               | Relative mRNA Level |        |         |        |
|--------------------------------------------|-------------|-----------------------------------------------------------|---------------------|--------|---------|--------|
|                                            |             |                                                           | CaM KD1             |        | CaM KD2 |        |
|                                            |             |                                                           | -                   | + Res. | -       | + Res. |
| NM_175930                                  | Rapgef5     | Rap guanine nucleotide exchange factor (GEF) 5            | 0.60                | 1.23   | 0.41    | 1.19   |
| NM_198419                                  | Phactr1     | phosphatase and actin regulator 1                         | 0.60                | 0.92   | 0.69    | 1.17   |
| NM_015743                                  | Nr4a3       | nuclear receptor subfamily 4, group A, member 3           | 0.58                | 1.17   | 0.68    | 1.10   |
| NM_130862                                  | Baiap2      | brain-specific angiogenesis inhibitor 1-associated protei | 0.56                | 0.85   | 0.60    | 1.20   |
| NM_008926                                  | Prkg2       | protein kinase, cGMP-dependent, type II                   | 0.48                | 1.35   | 0.63    | 1.35   |
| NM_009528                                  | Wnt7b       | wingless-related MMTV integration site 7B                 | 0.47                | 0.86   | 0.50    | 1.04   |
| <b>Category 7 :Vesicle and trafficking</b> |             |                                                           |                     |        |         |        |
| NM_009307                                  | Syt2        | synaptotagmin II                                          | 5.31                | 0.84   | 5.95    | 0.89   |
| NM_001080557                               | Vamp1       | vesicle-associated membrane protein 1                     | 2.61                | 1.05   | 3.06    | 1.03   |
| NM_016900                                  | Cav2        | caveolin 2                                                | 1.85                | 1.15   | 1.70    | 1.09   |
| NM_016908                                  | Syt9        | synaptotagmin IX                                          | 0.69                | 1.05   | 0.58    | 0.99   |
| NM_016801                                  | Stx1a       | syntaxin 1A (brain)                                       | 0.68                | 1.01   | 0.54    | 0.91   |
| NM_182993                                  | Slc17a7     | vGluT1                                                    | 0.67                | 0.96   | 0.49    | 0.89   |
| NM_009308                                  | Syt4        | synaptotagmin IV                                          | 0.65                | 1.09   | 0.64    | 0.86   |
| <b>Category 8: Cell Adhesion molecules</b> |             |                                                           |                     |        |         |        |
| NM_177129                                  | Cntn2       | contactin 2                                               | 2.54                | 1.06   | 1.89    | 0.80   |
| NM_016782                                  | Cntnap1     | contactin associated protein-like 1                       | 2.31                | 0.77   | 2.19    | 0.91   |
| NM_145219                                  | Lgi3        | leucine-rich repeat LGI family, member 3                  | 1.87                | 0.63   | 2.36    | 0.77   |
| NM_028880                                  | Lrrtm1      | leucine rich repeat transmembrane neuronal 1              | 0.71                | 0.96   | 0.66    | 0.98   |
| NM_001080814                               | Fat3        | FAT tumor suppressor homolog 3 (Drosophila)               | 0.70                | 1.19   | 0.58    | 1.35   |
| NM_080285                                  | Cttnbp2     | contactin binding protein 2                               | 0.66                | 0.89   | 0.66    | 1.44   |
| NM_020278                                  | Lgi1        | leucine-rich repeat LGI family, member 1                  | 0.62                | 1.11   | 0.36    | 1.03   |
| NM_008319                                  | Icam5       | intercellular adhesion molecule 5, telencephalin          | 0.62                | 0.92   | 0.45    | 1.05   |
| NM_177906                                  | Opcml       | opioid binding protein                                    | 0.62                | 0.91   | 0.58    | 0.98   |
| NM_021424                                  | Pvr1        | poliovirus receptor-related 1                             | 0.62                | 1.12   | 0.57    | 1.13   |
| NM_011858                                  | Odz4        | odd Oz                                                    | 0.61                | 0.93   | 0.66    | 1.08   |
| NM_011855                                  | Odz1        | odd Oz                                                    | 0.61                | 1.01   | 0.67    | 1.09   |
| NM_178678                                  | Lrrtm3      | leucine rich repeat transmembrane neuronal 3              | 0.57                | 1.04   | 0.67    | 1.31   |
| NM_001081298                               | Lphn2       | latrophilin 2                                             | 0.57                | 0.84   | 0.59    | 1.36   |
| <b>Category 9: Intercellular Signaling</b> |             |                                                           |                     |        |         |        |
| NM_172815                                  | Rspo2       | R-spondin 2 homolog (Xenopus laevis)                      | 0.71                | 1.30   | 0.68    | 1.06   |
| NM_009472                                  | Unc5c       | unc-5 homolog C (C. elegans)                              | 0.71                | 0.98   | 0.43    | 0.86   |
| NM_008882                                  | Plxna2      | plexin A2                                                 | 0.71                | 1.02   | 0.58    | 1.06   |
| NM_021436                                  | Tmeff1      | transmembrane protein with EGF-like and two follistatin-l | 0.71                | 0.99   | 0.69    | 1.11   |

| Accession No.             | Gene Symbol | Description                                               | Relative mRNA Level |        |         |        |
|---------------------------|-------------|-----------------------------------------------------------|---------------------|--------|---------|--------|
|                           |             |                                                           | CaM KD1             |        | CaM KD2 |        |
|                           |             |                                                           | -                   | + Res. | -       | + Res. |
| NM_010141                 | Epha7       | Eph receptor A7                                           | 0.69                | 0.94   | 0.54    | 0.93   |
| NM_198962                 | Hcrtr2      | hypocretin (orexin) receptor 2                            | 0.69                | 0.87   | 0.61    | 1.07   |
| NM_007938                 | Epha6       | Eph receptor A6                                           | 0.68                | 0.92   | 0.43    | 0.84   |
| NM_001126047              | Sema4c      | sema domain, immunoglobulin domain (Ig), transmembrane    | 0.68                | 1.13   | 0.67    | 1.17   |
| NM_007680                 | Ephb6       | Eph receptor B6                                           | 0.66                | 1.00   | 0.71    | 1.10   |
| NM_181074                 | Lingo1      | leucine rich repeat and Ig domain containing 1            | 0.63                | 1.28   | 0.48    | 1.15   |
| NM_013658                 | Sema4a      | sema domain, immunoglobulin domain (Ig), transmembrane do | 0.59                | 1.54   | 0.50    | 1.62   |
| NM_009217                 | Sstr2       | somatostatin receptor 2                                   | 0.54                | 1.12   | 0.52    | 1.36   |
| NM_031161                 | Cck         | cholecystokinin                                           | 0.50                | 1.22   | 0.35    | 1.18   |
| NM_009152                 | Sema3a      | sema domain, immunoglobulin domain (Ig), short basic doma | 0.50                | 1.85   | 0.60    | 1.14   |
| NM_010140                 | Epha3       | Eph receptor A3                                           | 0.50                | 1.40   | 0.33    | 1.13   |
| <b>Category 10: Other</b> |             |                                                           |                     |        |         |        |
| NM_030700                 | Maged2      | melanoma antigen, family D, 2                             | 2.68                | 1.08   | 2.70    | 0.80   |
| NM_001040611              | Peg10       | paternally expressed 10                                   | 2.44                | 0.67   | 6.11    | 0.91   |
| NM_027100                 | Rwdd2a      | RWD domain containing 2A                                  | 2.22                | 0.86   | 1.94    | 0.93   |
| NM_153104                 | Phospho1    | phosphatase, orphan 1                                     | 2.08                | 1.20   | 2.22    | 1.19   |
| NM_153169                 | Pnma3       | paraneoplastic antigen MA3                                | 1.98                | 0.79   | 1.80    | 0.82   |
| NM_009801                 | Car2        | carbonic anhydrase 2                                      | 1.74                | 1.12   | 1.44    | 0.96   |
| NM_011921                 | Aldh1a7     | aldehyde dehydrogenase family 1, subfamily A7             | 1.73                | 0.99   | 1.84    | 1.19   |
| NM_027533                 | Tspan2      | tetraspanin 2                                             | 1.65                | 1.04   | 1.85    | 1.09   |
| NM_028841                 | Tspan17     | tetraspanin 17                                            | 1.64                | 1.14   | 1.78    | 0.78   |
| NM_009780                 | C4b         | complement component 4B (Childo blood group)              | 1.63                | 1.11   | 2.12    | 0.81   |
| NM_011123                 | Plp1        | proteolipid protein (myelin) 1                            | 1.63                | 1.07   | 1.61    | 1.02   |
| NM_025943                 | Dzip1       | DAZ interacting protein 1                                 | 1.57                | 1.05   | 1.49    | 0.94   |
| NM_182991                 | Tmem59l     | transmembrane protein 59-like                             | 1.53                | 0.86   | 1.67    | 0.94   |
| NM_001001985              | Nat8l       | N-acetyltransferase 8-like                                | 1.50                | 1.00   | 1.42    | 0.89   |
| NM_010171                 | F3          | coagulation factor III                                    | 1.48                | 1.03   | 1.43    | 1.03   |
| NM_013813                 | Epb4.1l3    | erythrocyte protein band 4.1-like 3                       | 1.48                | 0.78   | 1.59    | 0.82   |
| NM_172604                 | Scara3      | scavenger receptor class A, member 3                      | 1.46                | 1.11   | 1.82    | 1.17   |
| ENSMUST00000029046        | Fabp5       | fatty acid binding protein 5, epidermal                   | 1.46                | 1.00   | 1.40    | 0.96   |
| NM_001038699              | Fn3k        | fructosamine 3 kinase                                     | 1.45                | 0.97   | 1.55    | 1.22   |
| ENSMUST00000067439        | Prune2      | prune homolog 2 (Drosophila)                              | 1.45                | 0.71   | 1.82    | 1.20   |
| NM_009155                 | Sepp1       | selenoprotein P, plasma, 1                                | 1.45                | 0.87   | 1.66    | 1.10   |
| NM_011020                 | Hspa4l      | heat shock protein 4 like                                 | 1.45                | 1.07   | 1.57    | 1.11   |
| NM_011843                 | Mbc2        | membrane bound C2 domain containing protein               | 1.44                | 0.96   | 2.69    | 1.06   |

| Accession No. | Gene Symbol | Description                                                 | Relative mRNA Level |        |         |        |
|---------------|-------------|-------------------------------------------------------------|---------------------|--------|---------|--------|
|               |             |                                                             | CaM KD1             |        | CaM KD2 |        |
|               |             |                                                             | -                   | + Res. | -       | + Res. |
| NM_145570     | Tmem166     | transmembrane protein 166                                   | 1.44                | 0.77   | 1.57    | 1.03   |
| NM_011994     | Abcd2       | ATP-binding cassette, sub-family D (ALD), member 2          | 1.43                | 0.86   | 1.43    | 0.83   |
| NM_184109     | Rtl1        | retrotransposon-like 1                                      | 1.42                | 1.00   | 1.52    | 1.01   |
| NM_026203     | Ahi1        | Abelson helper integration site 1                           | 1.41                | 1.06   | 1.72    | 1.07   |
| NM_011157     | Srgn        | serglycin                                                   | 1.40                | 0.80   | 1.63    | 1.08   |
| NM_173739     | Galnt4      | UDP-N-acetyl-alpha-D-galactosamine:polypeptide N-acetylgl   | 0.70                | 1.02   | 0.65    | 1.07   |
| NM_026898     | Wdr53       | WD repeat domain 53                                         | 0.70                | 0.87   | 0.60    | 0.96   |
| NM_001081146  | Prickle2    | prickle-like 2 (Drosophila)                                 | 0.70                | 0.96   | 0.52    | 1.08   |
| NM_013500     | Hapln1      | hyaluronan and proteoglycan link protein 1                  | 0.70                | 1.13   | 0.60    | 0.92   |
| NM_173777     | Olfm2       | olfactomedin 2                                              | 0.69                | 0.90   | 0.71    | 0.99   |
| NM_021286     | Sez6        | seizure related gene 6                                      | 0.69                | 0.98   | 0.57    | 1.14   |
| NM_010266     | Gda         | guanine deaminase                                           | 0.69                | 0.88   | 0.67    | 1.39   |
| BC021311      | Zswim6      | zinc finger, SWIM domain containing 6                       | 0.69                | 1.06   | 0.69    | 0.98   |
| NM_133706     | Tmem97      | transmembrane protein 97                                    | 0.69                | 1.59   | 0.67    | 1.47   |
| NM_172637     | Hectd2      | HECT domain containing 2                                    | 0.68                | 1.60   | 0.60    | 1.30   |
| NM_001024928  | Zfp667      | zinc finger protein 667                                     | 0.68                | 1.07   | 0.63    | 1.52   |
| NM_009262     | Spock1      | sparc                                                       | 0.68                | 0.93   | 0.48    | 1.07   |
| NM_146073     | Zdhhc14     | zinc finger, DHHC domain containing 14                      | 0.68                | 0.91   | 0.48    | 1.07   |
| NM_009270     | Sqle        | squalene epoxidase                                          | 0.68                | 1.18   | 0.46    | 1.20   |
| NM_133706     | Tmem97      | transmembrane protein 97                                    | 0.67                | 1.27   | 0.71    | 1.18   |
| NM_011119     | Pa2g4       | proliferation-associated 2G4                                | 0.67                | 1.01   | 0.67    | 0.88   |
| NM_153407     | Csnrp2      | cysteine-serine-rich nuclear protein 2                      | 0.67                | 0.99   | 0.64    | 1.11   |
| NM_198627     | Vstm2l      | V-set and transmembrane domain containing 2-like            | 0.67                | 1.14   | 0.57    | 1.02   |
| NM_011846     | Mmp17       | matrix metalloproteinase 17                                 | 0.67                | 1.15   | 0.57    | 1.04   |
| NM_178920     | Mal2        | mal, T-cell differentiation protein 2                       | 0.66                | 1.15   | 0.65    | 0.91   |
| NM_028185     | Lsm11       | U7 snRNP-specific Sm-like protein LSM11                     | 0.66                | 1.09   | 0.65    | 1.08   |
| NM_153155     | C1qf3       | C1q-like 3                                                  | 0.66                | 1.28   | 0.57    | 1.05   |
| U88401        | Mtag2       | metastasis associated gene 2                                | 0.66                | 0.95   | 0.71    | 1.00   |
| NM_199024     | Nol4        | nucleolar protein 4                                         | 0.65                | 0.84   | 0.61    | 1.26   |
| NM_033567     | Cecr6       | cat eye syndrome chromosome region, candidate 6 homolog (h) | 0.64                | 1.05   | 0.64    | 1.05   |
| NM_178252     | Snx26       | sorting nexin 26                                            | 0.64                | 1.03   | 0.48    | 0.88   |
| NM_201529     | Lmo7        | LIM domain only 7                                           | 0.64                | 0.92   | 0.45    | 1.12   |
| NM_001033212  | Rprml       | reprimin-like                                               | 0.64                | 1.32   | 0.65    | 1.19   |
| NM_175645     | Xylt1       | xylosyltransferase 1                                        | 0.63                | 0.84   | 0.59    | 1.21   |
| NM_001081388  | Rimbp2      | RIMS binding protein 2                                      | 0.62                | 0.84   | 0.42    | 0.95   |

| Accession No.                | Gene Symbol        | Description                                               | Relative mRNA Level |        |         |        |
|------------------------------|--------------------|-----------------------------------------------------------|---------------------|--------|---------|--------|
|                              |                    |                                                           | CaM KD1             |        | CaM KD2 |        |
|                              |                    |                                                           | -                   | + Res. | -       | + Res. |
| ENSMUST00000074081           | Csmd2              | CUB and Sushi multiple domains 2                          | 0.62                | 0.91   | 0.56    | 1.18   |
| NM_172434                    | Tnrc4              | trinucleotide repeat containing 4                         | 0.62                | 0.84   | 0.42    | 1.15   |
| NM_001005341                 | Ypel2              | yippee-like 2 (Drosophila)                                | 0.60                | 1.04   | 0.60    | 1.33   |
| NM_175502                    | Tmem74             | transmembrane protein 74                                  | 0.60                | 0.92   | 0.50    | 0.96   |
| NM_145981                    | Phyhip             | phytanoyl-CoA hydroxylase interacting protein             | 0.59                | 0.87   | 0.41    | 0.98   |
| NM_001039376                 | Pde4dip            | phosphodiesterase 4D interacting protein (myomegalin)     | 0.58                | 0.93   | 0.70    | 1.24   |
| NM_001081064                 | Pdzd2              | PDZ domain containing 2                                   | 0.56                | 1.10   | 0.62    | 1.21   |
| AK032191                     | Nol4               | nucleolar protein 4                                       | 0.55                | 0.98   | 0.64    | 1.06   |
| NM_008255                    | Hmgcr              | 3-hydroxy-3-methylglutaryl-Coenzyme A reductase           | 0.54                | 1.41   | 0.52    | 1.27   |
| AK162044                     | March11            | membrane-associated ring finger (C3HC4) 11                | 0.54                | 1.66   | 0.70    | 1.61   |
| NM_019967                    | Dbc1               | deleted in bladder cancer 1 (human)                       | 0.54                | 1.31   | 0.68    | 1.41   |
| NM_019675                    | Stmn4              | stathmin-like 4                                           | 0.52                | 1.00   | 0.50    | 0.86   |
| NM_201371                    | Prmt8              | protein arginine N-methyltransferase 8                    | 0.52                | 0.90   | 0.49    | 0.92   |
| NM_198306                    | Galnt9             | UDP-N-acetyl-alpha-D-galactosamine:polypeptide N-acetylga | 0.46                | 1.37   | 0.70    | 1.03   |
| Category 11: Uncharacterized |                    |                                                           |                     |        |         |        |
| BC052055                     | BC052055           | cDNA sequence BC052055                                    | 3.33                | 0.83   | 2.66    | 0.99   |
| BC125016                     | EG328644           | predicted gene, EG328644                                  | 2.44                | 0.67   | 3.01    | 1.10   |
| AF529169                     | AF529169           | cDNA sequence AF529169                                    | 1.85                | 1.04   | 1.99    | 0.88   |
| NM_001114174                 | Gm967              | gene model 967, (NCBI)                                    | 1.60                | 0.76   | 1.57    | 1.05   |
| NM_001081029                 | 4930420K17Rik      | RIKEN cDNA 4930420K17 gene                                | 1.57                | 1.04   | 1.56    | 1.20   |
| ENSMUST00000049544           | 2610301F02Rik      | RIKEN cDNA 2610301F02 gene                                | 1.43                | 1.14   | 1.47    | 1.12   |
| BC055818                     | D330028D13Rik      | RIKEN cDNA D330028D13 gene                                | 1.41                | 1.01   | 1.56    | 0.85   |
| NM_001039167                 | D11Bwg0517e        | DNA segment, Chr 11, Brigham & Women's Genetics 0         | 0.71                | 0.92   | 0.58    | 1.27   |
| NM_026279                    | 2310026E23Rik      | RIKEN cDNA 2310026E23 gene                                | 0.69                | 1.04   | 0.69    | 0.90   |
| BC119515                     | 1700001L19Rik      | RIKEN cDNA 1700001L19 gene                                | 0.69                | 0.94   | 0.57    | 1.14   |
| NM_144935                    | BC018242           | cDNA sequence BC018242                                    | 0.68                | 0.90   | 0.52    | 0.93   |
| NM_001033166                 | 2700094K13Rik      | RIKEN cDNA 2700094K13 gene                                | 0.67                | 0.93   | 0.70    | 1.02   |
| ENSMUST00000059500           | BC028663           | cDNA sequence BC028663                                    | 0.65                | 1.04   | 0.68    | 0.87   |
| ENSMUST00000057768           | 4930429B21Rik      | RIKEN cDNA 4930429B21 gene                                | 0.61                | 1.23   | 0.69    | 1.40   |
| ENSMUST00000061282           | OTTMUSG00000013918 | predicted gene, OTTMUSG00000013918                        | 0.60                | 1.00   | 0.41    | 1.83   |
| BC072639                     | 2010300C02Rik      | RIKEN cDNA 2010300C02 gene                                | 0.59                | 0.90   | 0.58    | 1.22   |
| NM_001033391                 | A130090K04Rik      | RIKEN cDNA A130090K04 gene                                | 0.57                | 1.09   | 0.48    | 1.41   |
| BC092532                     | 2900046G09Rik      | RIKEN cDNA 2900046G09 gene                                | 0.51                | 0.97   | 0.48    | 1.06   |
| ENSMUST00000068927           | A330084C13Rik      | RIKEN cDNA A330084C13 gene                                | 0.50                | 1.13   | 0.58    | 0.87   |



| Accession No.      | Gene Symbol   | Description                         | Relative mRNA Level |        |         |        |
|--------------------|---------------|-------------------------------------|---------------------|--------|---------|--------|
|                    |               |                                     | CaM KD1             |        | CaM KD2 |        |
|                    |               |                                     | -                   | + Res. | -       | + Res. |
| XM_001473525       | LOC100039795  | similar to C1orf32 putative protein | 0.46                | 0.97   | 0.62    | 1.32   |
| NM_029530          | 6330527O06Rik | RIKEN cDNA 6330527O06 gene          | 0.44                | 1.56   | 0.69    | 1.53   |
| ENSMUST00000101196 | 3110047P20Rik | RIKEN cDNA 3110047P20 gene          | 0.40                | 0.99   | 0.29    | 1.12   |
| NM_182808          | C630007B19Rik | RIKEN cDNA C630007B19 gene          | 0.39                | 1.60   | 0.28    | 1.49   |

Data shown are from two independent experiments performed with neurons that contained the CaM KD shRNAs, without or with full-length CaM rescue. Data are shown as fold of change (normalized to the control).

**Supplementary Table 2**  
 Numeric data presented in the paper

| Figure number | Descriptions                          | Mean    | ± | SEM    | n  | p Value* |
|---------------|---------------------------------------|---------|---|--------|----|----------|
| Figure 1      | 1E Syt1 KO mIPSC Frequency (Hz)       |         |   |        |    |          |
|               | Control                               | 7.46    | ± | 0.42   | 18 |          |
|               | CaM KD                                | 3.55    | ± | 0.45   | 21 | P<0.001  |
|               | CaM KD+WT CaM                         | 6.59    | ± | 0.65   | 17 | n.s.     |
|               | 1F Syt1 KO mIPSC Amplitude (pA)       |         |   |        |    |          |
|               | Control                               | 26.5    | ± | 1.6    | 18 |          |
|               | CaM KD                                | 30.5    | ± | 1.8    | 21 | n.s.     |
|               | CaM KD+WT CaM                         | 28.4    | ± | 2.7    | 17 | n.s.     |
|               | 1G Syt1 KO mIPSC Rise Time (ms)       |         |   |        |    |          |
|               | Control                               | 1.92    | ± | 0.11   | 18 |          |
|               | CaM KD                                | 1.83    | ± | 0.11   | 21 | n.s.     |
|               | CaM KD+WT CaM                         | 1.79    | ± | 0.12   | 17 | n.s.     |
|               |                                       | 21.0222 |   | 2.8229 |    |          |
|               |                                       | 23.7286 |   | 0.6222 |    |          |
|               |                                       | 22.5706 |   | 0.7204 |    |          |
|               | 1G Syt1 KO mIPSC Decay Time (ms)      |         |   |        |    |          |
|               | Control                               | 21.02   | ± | 2.82   | 18 |          |
|               | CaM KD                                | 23.73   | ± | 0.62   | 21 | n.s.     |
|               | CaM KD+WT CaM                         | 22.57   | ± | 0.72   | 17 | n.s.     |
| Figure 2      | 2B Syt1 KO evoked IPSC Amplitude (nA) |         |   |        |    |          |
|               | Control                               | 0.24    | ± | 0.02   | 44 |          |
|               | CaM KD                                | 1.32    | ± | 0.13   | 49 | P<0.001  |
|               | CaM KD+WT CaM                         | 0.21    | ± | 0.03   | 15 | n.s.     |
| Figure 4      | 4A Relative mRNA level                |         |   |        |    |          |
|               | Syt2 (Control)                        | 1.00    | ± | 0.00   | 5  |          |
|               | Syt2 (CaM KD)                         | 10.42   | ± | 3.12   | 5  | P<0.05   |
|               | Syt2 (CaM KD+WT Res.)                 | 0.92    | ± | 0.15   | 4  | n.s.     |
|               | Lrrtm3 (Control)                      | 1.00    | ± | 0.00   | 3  |          |
|               | Lrrtm 3 (CaM KD)                      | 0.47    | ± | 0.02   | 3  | P<0.001  |

| Figure number | Descriptions                    | Mean | ± | SEM  | n | p Value* |
|---------------|---------------------------------|------|---|------|---|----------|
|               | CaM 3 (Control)                 | 1.00 | ± | 0.00 | 4 |          |
|               | CaM 3 (CaM KD)                  | 0.26 | ± | 0.08 | 4 | P<0.01   |
|               | CaM 3 ((CaM KD+WT Res.)         | 0.10 | ± | 0.03 | 4 | P<0.001  |
| Figure 5      | 5B Protein expression level (%) |      |   |      |   |          |
|               | CaM (Control)                   | 100  | ± | 13   | 3 |          |
|               | CaM (CaM KD)                    | 23   | ± | 3    | 3 | P<0.01   |
|               | CaM (CaM KD+WT Res)             | 200  | ± | 19   | 3 | P<0.05   |
|               | CaM (CaM KD+CaM1,2,3,4)         | 467  | ± | 54   | 3 | P<0.01   |
|               | Syt2 (Control)                  | 100  | ± | 39   | 3 |          |
|               | Syt2 (CaM KD)                   | 1045 | ± | 37   | 3 | P<0.001  |
|               | Syt2 (CaM KD+WT Res)            | 107  | ± | 41   | 3 | n.s.     |
|               | Syt2 (CaM KD+CaM1,2,3,4)        | 401  | ± | 59   | 3 | P<0.05   |
|               | Rab3A (Control)                 | 100  | ± | 29   | 3 | n.s.     |
|               | Rab3A (CaM KD)                  | 59   | ± | 21   | 3 | n.s.     |
|               | Rab3A (CaM KD+WT Res)           | 92   | ± | 27   | 3 | n.s.     |
|               | Rab3A (CaM KD+CaM1,2,3,4)       | 58   | ± | 9    | 3 | n.s.     |
|               | Syt1 (Control)                  | 100  | ± | 5    | 3 |          |
|               | Syt1 (CaM KD)                   | 55   | ± | 15   | 3 | P<0.05   |
|               | Syt1 (CaM KD+WT Res)            | 102  | ± | 6    | 3 | n.s.     |
|               | Syt1 (CaM KD+CaM1,2,3,4)        | 44   | ± | 15   | 3 | P<0.05   |
|               | Synt1 (Control)                 | 100  | ± | 16   | 3 |          |
|               | Synt1 (CaM KD)                  | 97   | ± | 28   | 3 | n.s.     |
|               | Synt1(CaM KD+WT Res)            | 85   | ± | 10   | 3 | n.s.     |
|               | Synt1 (CaM KD+CaM1,2,3,4)       | 75   | ± | 9    | 3 | n.s.     |
|               | SNAP25 (Control)                | 100  | ± | 19   | 3 |          |
|               | SNAP25 (CaM KD)                 | 87   | ± | 35   | 3 | n.s.     |
|               | SNAP25 (CaM KD+WT Res)          | 101  | ± | 14   | 3 | n.s.     |
|               | SNAP25 (CaM KD+CaM1,2,3,4)      | 64   | ± | 22   | 3 | n.s.     |
|               | Rabphilin (Control)             | 100  | ± | 16   | 3 |          |

| Figure number | Descriptions                    | Mean | ± | SEM | n | p Value* |
|---------------|---------------------------------|------|---|-----|---|----------|
|               | Rabphilin (CaM KD)              | 36   | ± | 5   | 3 | P<0.05   |
|               | Rabphilin (CaM KD+WT Res)       | 126  | ± | 14  | 3 | n.s.     |
|               | Rabphilin (CaM KD+CaM1,2,3,4)   | 31   | ± | 2   | 3 | P<0.05   |
|               | CSP (Control)                   | 100  | ± | 2   | 3 |          |
|               | CSP (CaM KD)                    | 75   | ± | 11  | 3 | n.s.     |
|               | CSP (CaM KD+WT Res)             | 90   | ± | 17  | 3 | n.s.     |
|               | CSP (CaM KD+CaM1,2,3,4)         | 56   | ± | 13  | 3 | P<0.05   |
|               | Munc 18 (Control)               | 100  | ± | 29  | 3 |          |
|               | Munc 18 (CaM KD)                | 69   | ± | 21  | 3 | n.s.     |
|               | Munc 18 (CaM KD+WT Res)         | 93   | ± | 22  | 3 | n.s.     |
|               | Munc 18 (CaM KD+CaM1,2,3,4)     | 92   | ± | 32  | 3 | n.s.     |
|               | SCAMP (Control)                 | 100  | ± | 32  | 3 |          |
|               | SCAMP (CaM KD)                  | 60   | ± | 16  | 3 | n.s.     |
|               | SCAMP (CaM KD+WT Res)           | 113  | ± | 29  | 3 | n.s.     |
|               | SCAMP (CaM KD+CaM1,2,3,4)       | 73   | ± | 23  | 3 | n.s.     |
|               | PSD95 (Control)                 | 100  | ± | 6   | 3 |          |
|               | PSD95 (CaM KD)                  | 81   | ± | 1   | 3 | P<0.05   |
|               | PSD95 (CaM KD+WT Res)           | 90   | ± | 7   | 3 | n.s.     |
|               | PSD95 (CaM KD+CaM1,2,3,4)       | 76   | ± | 7   | 3 | P<0.05   |
|               | NSF (Control)                   | 100  | ± | 5   | 3 |          |
|               | NSF (CaM KD)                    | 69   | ± | 1   | 3 | P<0.01   |
|               | NSF (CaM KD+WT Res)             | 95   | ± | 8   | 3 | n.s.     |
|               | NSF (CaM KD+CaM1,2,3,4)         | 78   | ± | 6   | 3 | n.s.     |
|               | Neuroigin 1 (Control)           | 100  | ± | 25  | 3 |          |
|               | Neuroigin 1 (CaM KD)            | 70   | ± | 15  | 3 | n.s.     |
|               | Neuroigin 1 (CaM KD+WT Res)     | 85   | ± | 14  | 3 | n.s.     |
|               | Neuroigin 1 (CaM KD+CaM1,2,3,4) | 74   | ± | 19  | 3 | n.s.     |
|               | Neuroigin 2 (Control)           | 100  | ± | 20  | 3 |          |
|               | Neuroigin 2 (CaM KD)            | 88   | ± | 6   | 3 | n.s.     |
|               | Neuroigin 2 (CaM KD+WT Res)     | 95   | ± | 7   | 3 | n.s.     |

| Figure number | Descriptions                                | Mean | ± | SEM  | n  | p Value* |
|---------------|---------------------------------------------|------|---|------|----|----------|
|               | Neurologin 2 (CaM KD+CaM1,2,3,4)            | 84   | ± | 5    | 3  | n.s.     |
| Figure 6      | 6B CaM/VCP                                  |      |   |      |    |          |
|               | Cortex                                      | 1.66 | ± | 0.04 | 4  |          |
|               | Cerebellum                                  | 1.16 | ± | 0.06 | 4  | P<0.001  |
|               | Spinal cord                                 | 0.85 | ± | 0.06 | 4  | P<0.001  |
|               | Syt1/VCP                                    |      |   |      |    |          |
|               | Cortex                                      | 6.97 | ± | 0.12 | 4  |          |
|               | Cerebellum                                  | 2.55 | ± | 0.26 | 4  | P<0.001  |
|               | Spinal cord                                 | 1.05 | ± | 0.15 | 4  | P<0.001  |
|               | Syt2/VCP                                    |      |   |      |    |          |
|               | Cortex                                      | 0.46 | ± | 0.02 | 4  |          |
|               | Cerebellum                                  | 1.46 | ± | 0.03 | 4  | P<0.001  |
|               | Spinal cord                                 | 1.04 | ± | 0.04 | 4  | P<0.001  |
|               | Syb1/VCP                                    |      |   |      |    |          |
|               | Cortex                                      | 0.73 | ± | 0.04 | 4  |          |
|               | Cerebellum                                  | 2.77 | ± | 0.09 | 4  | P<0.001  |
|               | Spinal cord                                 | 2.33 | ± | 0.20 | 4  | P<0.001  |
| Figure 7      | 7D Rescue evoked IPSCs Amplitude in Syt1 KO |      |   |      |    |          |
|               | Control (same data set as in 1b)            | 0.24 | ± | 0.02 | 44 |          |
|               | CaM KD+CaM1,2                               | 0.22 | ± | 0.04 | 17 | n.s.     |
|               | CaM KD+CaM3,4                               | 0.82 | ± | 0.12 | 13 | P<0.001  |
|               | CaM KD+CaM1,2,3,4                           | 0.95 | ± | 0.18 | 16 | P<0.001  |

\* P value obtained by Student t-test, compared to control group.

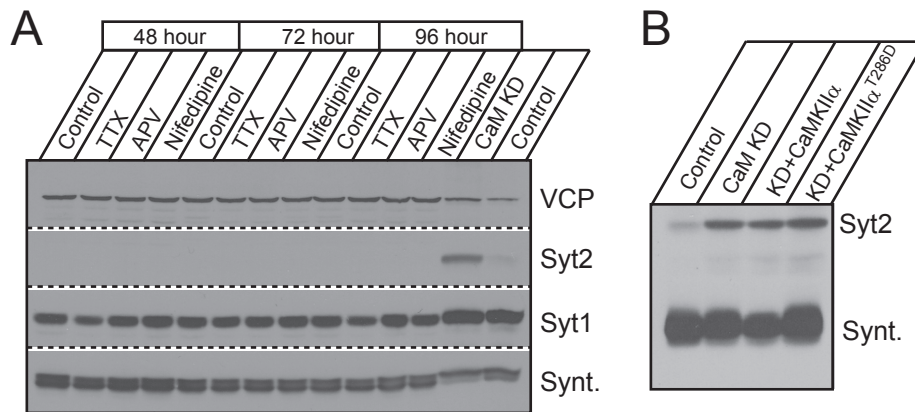

Suppl. Figure 1  
Pang et al.
